# Supplementary material
Source: PubMed Central journal article supplement (PMC2431102)
Supplement: M800053-JLR200_1.pdf [file M800053-JLR200_1.pdf]

**Supplement Table 1.** Sequences for sequencing the genes in strains NZB and NZW

| Exon                   | Forward Primer ( 5'-3' ) | Reverse Primer ( 5'-3' ) |
|------------------------|--------------------------|--------------------------|
| <b><u>Gba2</u></b>     |                          |                          |
| 1                      | tggcgactttgttctgtag      | ataggaaccacggcgttcta     |
| 2-3                    | gagtgtagcttacaagaaac     | tatgctagccaagagtcaact    |
| 4                      | accaagtgtgttgcctgt       | atggaatgaagcaaacagga     |
| 5                      | gtactctctggccactccta     | gftagaggtaaagtaggttc     |
| 6-7                    | agagctagtcagaatccagt     | acagatgctctaggctagac     |
| 8-9                    | gtctagcctagagcatctgt     | aggacacacctagctctgac     |
| 10-12                  | gcattctggcaacagtgtct     | agctacatccctggataact     |
| 13-15                  | agtataccagggatgtagct     | ttctggcttctccagcctct     |
| 16                     | agaggctggagaagccagaa     | ggacctcagtacaatggtg      |
| 17                     | tgtcttctctgctcagctaa     | ggcacagctgggaaggaaga     |
| <b><u>Ppargc1b</u></b> |                          |                          |
| 1                      | ctggtcctcgcgctagacta     | gctcgttcctctgcagctg      |
| 2                      | cttgggtgaccataagctgg     | cagaaagctcatagctcca      |
| 3                      | ataagctggctgggtatggc     | agcatagaaggcaggagact     |
| 4                      | cctctttgtttctccatcc      | gcagtctgacatcagctcca     |
| 5                      | tagtctttcccctctgcct      | gagagagacttgtgtagact     |
| 6                      | cttctggctacttactagag     | agggaagcatagacaggtat     |
| 6                      | ccttctggactgagttctct     | tctgggtgaccacagaatac     |
| 7                      | gagaatgggtgatgtgggga     | aaatgcacacatctaagaca     |
| 8                      | tgtagaagccctcctactga     | tcagttcatgaggagatgca     |
| 9                      | atgtcctccaagaagacctg     | cctttgtttccgttggcaga     |

|    |                      |                       |
|----|----------------------|-----------------------|
| 9  | tccaccttgaagacttgcc  | tacctaattggctgctcagat |
| 10 | gagtaagattgagcactgtg | tgaagactggtggcttagca  |
| 11 | tagacagagactccatgaga | ccctactgtcttggctagc   |
| 12 | tccttagcatccaccagg   | atactctgggacgcattaca  |
| 13 | ctcagtggtagatttgctgg | gtgatctctcacgctcactc  |

**Timp3**

|   |                     |                      |
|---|---------------------|----------------------|
| 1 | cgtgcccaactgcattat  | cagggaaactgagtcttc   |
| 2 | ttccaggcgtggtcaggcc | ttctacactgagcaaacaca |
| 3 | actctacagaactaca    | tgaggagccaggtgtctgca |
| 4 | gaaggtgtctcaaacca   | caggcagcgaatacagaaca |
| 5 | tctggtagcattaaagg   | cagagatccccagttggaaa |

---

**Supplement Table 2.** Positional candidate genes for TG QTL

| Mb                          | Gene                 | Mb     | Gene                 | Mb     | Gene                 | Mb     | Gene                 |
|-----------------------------|----------------------|--------|----------------------|--------|----------------------|--------|----------------------|
| <b><u>Chr 4</u></b>         |                      |        |                      |        |                      |        |                      |
| 35.90                       | <i>Lingo2</i>        | 42.61  | <i>4933409K07Rik</i> | 42.89  | <i>BC049635</i>      | 43.58  | <i>Creb3</i>         |
| 41.69                       | <i>1110017D15Rik</i> | 42.63  | <i>Ccl21c</i>        | 43.29  | <i>4930417M19Rik</i> | 43.59  | <i>Gba2</i>          |
| 41.71                       | <i>2310028H24Rik</i> | 42.67  | <i>Ccl27</i>         | 43.40  | <i>Rusc2</i>         | 43.60  | <i>1110029E03Rik</i> |
| 41.94                       | <i>Galt</i>          | 42.68  | <i>Il1ra2</i>        | 43.50  | <i>Sit1</i>          | 43.65  | <i>Npr2</i>          |
| 41.95                       | <i>Il1ra1</i>        | 42.69  | <i>1700045I11Rik</i> | 43.52  | <i>Car9</i>          | 43.67  | <i>Spag8</i>         |
| 41.96                       | <i>NP_035466.1</i>   | 42.76  | <i>4930578G10Rik</i> | 43.54  | <i>Tpm2</i>          |        |                      |
| 42.60                       | <i>4930466F19Rik</i> | 42.77  | <i>Ccl19</i>         | 43.55  | <i>Tln1</i>          |        |                      |
| <b><u>Tgq4 on Chr 7</u></b> |                      |        |                      |        |                      |        |                      |
| 58.53                       | <i>Atp10a</i>        | 105.51 | <i>Arfp2</i>         | 109.31 | <i>snoMBI-28</i>     | 110.56 | <i>Ampd3</i>         |
| 63.32                       | <i>Otud7a</i>        | 107.16 | <i>Syt9</i>          | 109.32 | <i>St5</i>           | 110.66 | <i>Mrv1</i>          |
| 65.18                       | <i>Tjp1</i>          | 107.36 | <i>Olfml1</i>        | 110.01 | <i>Swap70</i>        | 112.22 | <i>Parva</i>         |
| 65.52                       | <i>Tm2d3</i>         | 107.39 | <i>Ppfibp2</i>       | 110.10 | <i>Sbf2</i>          | 112.47 | <i>Tead1</i>         |
| 105.35                      | <i>Prkcdbp</i>       | 107.42 | <i>5330417H12Rik</i> | 110.42 | <i>Adm</i>           | 115.26 | <i>Sox6</i>          |
| 105.48                      | <i>Trim3</i>         | 109.24 | <i>Trim66</i>        | 110.56 | <i>B430319F04Rik</i> | 115.92 | <i>Plekha7</i>       |
| <b><u>Tgq5 on Chr 8</u></b> |                      |        |                      |        |                      |        |                      |
| 3.15                        | <i>Insr</i>          | 3.62   | <i>Pcp2</i>          | 4.18   | <i>4932443L11Rik</i> | 10.01  | <i>Tnfsf13b</i>      |
| 3.36                        | <i>A430078G23Rik</i> | 3.63   | <i>Stxbp2</i>        | 4.23   | <i>Lrrc8e</i>        | 10.27  | <i>Myo16</i>         |
| 3.4                         | <i>Arhgef18</i>      | 3.66   | <i>Retn</i>          | 4.24   | <i>Map2k7</i>        | 11.00  | <i>Irs2</i>          |
| 3.45                        | <i>Pex11c</i>        | 3.67   | <i>1810033B17Rik</i> | 4.25   | <i>Snapc2</i>        | 11.20  | <i>Col4a1</i>        |
| 3.47                        | <i>1700019B03Rik</i> | 3.68   | <i>Trappc5</i>       | 4.26   | <i>Ctxn1</i>         | 11.35  | <i>Col4a2</i>        |
| 3.49                        | <i>Zfp358</i>        | 3.68   | <i>Fcer2a</i>        | 4.26   | <i>Timm44</i>        | 11.51  | <i>Cars2</i>         |

|      |                      |      |                      |      |                |       |                      |
|------|----------------------|------|----------------------|------|----------------|-------|----------------------|
| 3.52 | <i>Pnpla6</i>        | 3.72 | <i>Clec4g</i>        | 4.29 | <i>Elavl1</i>  | 11.73 | <i>Arhgef7</i>       |
| 3.58 | <i>C330021F23Rik</i> | 4.09 | <i>2610208M17Rik</i> | 5.09 | <i>Slc10a2</i> | 11.84 | <i>1700018L24Rik</i> |
| 3.59 | <i>2310057J16Rik</i> | 4.10 | <i>Cd209f</i>        | 9.97 | <i>Lig4</i>    |       |                      |
| 3.61 | <i>Xab2</i>          | 4.17 | <i>B130050I23Rik</i> | 9.98 | <i>Abhd13</i>  |       |                      |

**Tgq6 on Chr 18**

|       |                      |       |                 |       |                      |       |                |
|-------|----------------------|-------|-----------------|-------|----------------------|-------|----------------|
| 52.65 | <i>Lox</i>           | 60.34 | <i>EG240327</i> | 61.35 | <i>Pde6a</i>         | 61.68 | <i>Csnk1a1</i> |
| 52.89 | <i>Sncaip</i>        | 60.39 | <i>EG225594</i> | 61.42 | <i>Ppargc1b</i>      | 61.81 | <i>Il17b</i>   |
| 59.30 | <i>4833446K15Rik</i> | 60.81 | <i>Ndst1</i>    | 61.62 | <i>4933429F08Rik</i> | 61.93 | <i>Ablim3</i>  |

---

**Supplement Table 3.** Positional candidate genes for glucose QTL

| Mb                           | Gene                 | Mb     | Gene                 | Mb     | Gene                 | Mb     | Gene                 |
|------------------------------|----------------------|--------|----------------------|--------|----------------------|--------|----------------------|
| <b><u>Bglu4 on Chr2</u></b>  |                      |        |                      |        |                      |        |                      |
| 68.01                        | <i>Stk39</i>         | 69.02  | <i>G6pc2</i>         | 70.91  | <i>Cybrd1</i>        | 71.25  | <i>Metapl1</i>       |
| 68.46                        | <i>4932414N04Rik</i> | 69.03  | <i>Abcb11</i>        | 71.01  | <i>Dync1i2</i>       | 71.33  | <i>Dlx1</i>          |
| 68.93                        | <i>Nostrin</i>       | 70.76  | <i>Mettl8</i>        | 71.07  | <i>Slc25a12</i>      | 71.34  | <i>Dlx2</i>          |
| 68.99                        | <i>Spc25</i>         | 70.85  | <i>4833418A01Rik</i> | 71.19  | <i>Hat1</i>          |        |                      |
| <b><u>Bglu5 on Chr2</u></b>  |                      |        |                      |        |                      |        |                      |
| 154.48                       | <i>Raly</i>          | 155.39 | <i>Edem2</i>         | 155.83 | <i>Rbm39</i>         | 164.43 | <i>Wfdc3</i>         |
| 154.75                       | <i>Ahcy</i>          | 155.44 | <i>Procr</i>         | 155.88 | <i>Phf20</i>         | 164.43 | <i>Dnttip1</i>       |
| 154.82                       | <i>Itch</i>          | 155.46 | <i>Mmp24</i>         | 161.22 | <i>Ptprt</i>         | 164.46 | <i>Ube2c</i>         |
| 154.93                       | <i>Dynlrb1</i>       | 155.51 | <i>Itgb4bp</i>       | 163.55 | <i>Rims4</i>         | 164.46 | <i>Tnnc2</i>         |
| 154.93                       | <i>Pigu</i>          | 155.63 | <i>Gdf5</i>          | 164.15 | <i>Sys1</i>          | 164.47 | <i>Snx21</i>         |
| 155.07                       | <i>Trp53inp2</i>     | 155.64 | <i>Cep250</i>        | 164.16 | <i>1700126L10Rik</i> | 164.48 | <i>Acot8</i>         |
| 155.08                       | <i>Ncoa6</i>         | 155.69 | <i>Ergic3</i>        | 164.17 | <i>Dbnnd2</i>        | 164.52 | <i>Neurl2</i>        |
| 155.18                       | <i>Ggtl3</i>         | 155.71 | <i>Fer1l4</i>        | 164.18 | <i>Pigt</i>          | 164.52 | <i>Ctsa</i>          |
| 155.2                        | <i>Myh7b</i>         | 155.75 | <i>Spag4</i>         | 164.27 | <i>Wfdc6a</i>        | 164.53 | <i>Pltp</i>          |
| 155.25                       | <i>Gss</i>           | 155.78 | <i>Rbm12</i>         | 164.28 | <i>Wfdc8</i>         | 164.63 | <i>Mmp9</i>          |
| <b><u>Bglu6 on Chr 4</u></b> |                      |        |                      |        |                      |        |                      |
| 35.89                        | <i>Lrrn6c</i>        | 41.95  | <i>NP_0354661</i>    | 42.25  | <i>EG545605</i>      | 42.6   | <i>4930466F19Rik</i> |
| 41.69                        | <i>1110017D15Rik</i> | 42.01  | <i>Ccl21c</i>        | 42.32  | <i>Ccl27</i>         | 42.68  | <i>1700045I11Rik</i> |
| 41.7                         | <i>2310028H24Rik</i> | 42.03  | <i>Ccl19</i>         | 42.32  | <i>Il11ra2</i>       | 42.79  | <i>Ccl21b</i>        |
| 41.95                        | <i>Il11ral</i>       | 42.25  | <i>4930466F19Rik</i> | 42.47  | <i>4933409K07Rik</i> | 42.88  | <i>BC049635</i>      |
| <b><u>Bglu8 on Chr15</u></b> |                      |        |                      |        |                      |        |                      |

|       |                |       |                      |       |              |       |                    |
|-------|----------------|-------|----------------------|-------|--------------|-------|--------------------|
| 32.86 | <i>Sdc2</i>    | 60.65 | <i>D330050I23Rik</i> | 63.91 | <i>Ddef1</i> | 68.13 | <i>Rpl21</i>       |
| 33.63 | <i>Tspyl5</i>  | 60.65 | <i>9930014A18Rik</i> | 64.52 | <i>Adcy8</i> | 68.16 | <i>mmu-mir-30b</i> |
| 60.53 | <i>SNORA17</i> | 60.74 | <i>Albg</i>          | 67.91 | <i>Zfat1</i> | 68.17 | <i>mmu-mir-30d</i> |

**Bglu9 on Chr17**

|       |                      |       |                      |       |                   |       |                |
|-------|----------------------|-------|----------------------|-------|-------------------|-------|----------------|
| 5.77  | <i>3300005D01Rik</i> | 28.49 | <i>Mapk13</i>        | 33.74 | <i>H2-DMb1</i>    | 36.24 | <i>H2-M9</i>   |
| 9.51  | <i>Pabpc3</i>        | 28.53 | <i>Brpf3</i>         | 33.98 | <i>Btnl1</i>      | 36.27 | <i>H2-M1</i>   |
| 10.68 | <i>Park2</i>         | 28.58 | <i>Pnplal</i>        | 34    | <i>BC051142</i>   | 36.42 | <i>H2-M106</i> |
| 14.56 | <i>Wdr27</i>         | 28.62 | <i>4930539E08Rik</i> | 34.17 | <i>Notch4</i>     | 36.44 | <i>Trim26</i>  |
| 14.67 | <i>1600012H06Rik</i> | 28.86 | <i>9830134C10Rik</i> | 35.54 | <i>NM_0197123</i> |       |                |
| 14.68 | <i>Phf10</i>         | 28.88 | <i>Cpne5</i>         | 35.56 | <i>Abcf1</i>      |       |                |
| 28.41 | <i>Mapk14</i>        | 29.27 | <i>Tbc1d22b</i>      | 35.89 | <i>H2-M102</i>    |       |                |

**Bglu10 on Chr 18**

|       |                      |       |                      |       |                |       |                |
|-------|----------------------|-------|----------------------|-------|----------------|-------|----------------|
| 21.69 | <i>Klhl14</i>        | 21.95 | <i>4921528I01Rik</i> | 42.04 | <i>Prelid2</i> | 42.18 | <i>Sh3rf2</i>  |
| 21.79 | <i>4930426D05Rik</i> | 23.18 | <i>Nol4</i>          | 42.11 | <i>Gm851</i>   | 42.76 | <i>Ppp2r2b</i> |

---
